# Supplementary material
Source: Hindawi journal article supplement (doi:10.1155/2011/204216)
Supplement: f1 [file 204216.f1.pdf]

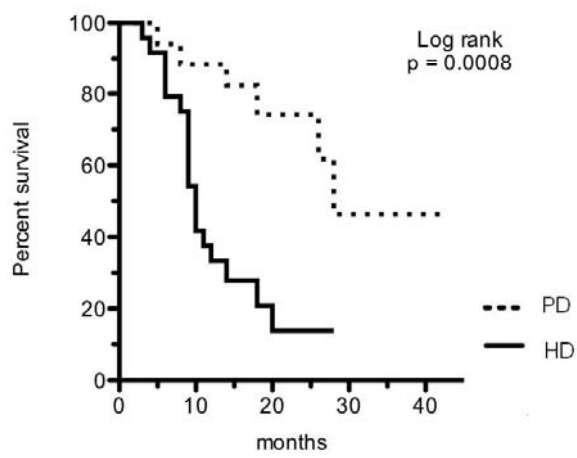

**Fig 1** Tx-censored Kaplan-Meier survival of significant RRF (>100 ml/day) during incremental PD or HD

|    | at RRT initiation<br>(number of patients) | at Tx                       |
|----|-------------------------------------------|-----------------------------|
| PD | 2 liters once daily (5)                   | 2 liters twice daily (3)    |
|    | 2 liters twice daily (5)                  | 2 liters thrice daily (2)   |
|    | 10 liters nightly APD (5)                 | 2 liters 4 times daily (1)  |
|    | 15 liters nightly APD (2)                 | 10 liters nightly APD (1)   |
|    |                                           | 15 liters nightly APD (4)   |
|    |                                           | 20 liters nightly APD (4)   |
|    |                                           | 25 liters nightly APD (1)   |
|    |                                           | 22 liters CCPD (1)          |
| HD | 3 hours twice weekly (5)                  | 3 hours thrice weekly (1)   |
|    | 3,5 hours twice weekly (3)                | 3,5 hours thrice weekly (4) |
|    | 3 hours thrice weekly (6)                 | 4 hours thrice weekly (17)  |
|    | 3,5 hours thrice weekly (8)               | 4 hours 4 times a week (2)  |
|    | 4 hours thrice weekly (2)                 |                             |

**Table 4** Dialysis dose at the beginning of RRT and at transplant time
